# Supplementary material for: Randomised controlled trial of intermittent vs continuous energy restriction during chemotherapy for early breast cancer
Source: PubMed Central journal article supplement (PMC9023522; doi:10.1038/s41416-021-01650-0), 2021-12-15
Supplement: 41416_2021_1650_MOESM6_ESM.pdf [file 41416_2021_1650_MOESM6_ESM.pdf]

**Supplementary Table 4: Dietary intake and physical activity in the IER and CER groups for completers**

|                                      | Baseline                    | Average during 3 weeks in chemotherapy cycle 3 or 4 | P value <sup>a</sup> | 3 weeks post end of chemotherapy | P value <sup>b</sup> |
|--------------------------------------|-----------------------------|-----------------------------------------------------|----------------------|----------------------------------|----------------------|
| Energy (kcal)                        |                             |                                                     |                      |                                  |                      |
| IER                                  | 1697 (1583-1813)            | 1398 (1302-1494)                                    | 0.86                 | 1409 (1317-1500)                 | 0.75                 |
| CER                                  | 1670 (1572-1770)            | 1365 (1283-1447)                                    |                      | 1417 (1339-1494)                 |                      |
| Protein (g)                          |                             |                                                     |                      |                                  |                      |
| IER                                  | 72.6 (68.2-77.1)            | 75.8 (70.9-80.8)                                    | 0.059                | 77.5 (72.4-82.6)                 | 0.039                |
| CER                                  | 72.0 (68.5-75.5)            | 68.3 (64.1-72.5)                                    |                      | 71.2 (67.5-74.8)                 |                      |
| Carbohydrate (g)                     |                             |                                                     |                      |                                  |                      |
| IER                                  | 199 (184-215)               | 145 (134-157)                                       | 0.04                 | 151 (138-165)                    | 0.034                |
| CER                                  | 195 (182-208)               | 162 (151-172)                                       |                      | 165 (155-176)                    |                      |
| Total fat (g)                        |                             |                                                     |                      |                                  |                      |
| IER                                  | 67.9 (61.4-74.4)            | 59.0 (53.8-64.2)                                    | 0.10                 | 55.4 (50.6-60.3)                 | 0.42                 |
| CER                                  | 66.5 (61.4-71.7)            | 51.9 (48.0-55.8)                                    |                      | 52.6 (48.6-56.7)                 |                      |
| Saturated fat (g)                    |                             |                                                     |                      |                                  |                      |
| IER                                  | 24.7 (21.7-27.6)            | 20.1 (18.0-22.2)                                    | 0.45                 | 18.8 (17.0-20.7)                 | 0.96                 |
| CER                                  | 25.2 (22.7-27.6)            | 18.5 (16.8-20.2)                                    |                      | 19.0 (17.2-20.8)                 |                      |
| Monounsaturated fat (g)              |                             |                                                     |                      |                                  |                      |
| IER                                  | 23.2 (20.9-25.5)            | 21.0 (19.1-22.8)                                    | 0.047                | 19.4 (17.6-21.2)                 | 0.45                 |
| CER                                  | 22.1 (20.5-23.8)            | 17.7 (16.7-20.2)                                    |                      | 18.3 (16.7-19.8)                 |                      |
| Polyunsaturated fat (g)              |                             |                                                     |                      |                                  |                      |
| IER                                  | 11.8 (10.7-12.9)            | 10.2 (9.2-11.2)                                     | 0.14                 | 9.5 (8.5-10.6)                   | 0.50                 |
| CER                                  | 10.5 (9.5-11.4)             | 8.7 (7.9-9.5)                                       |                      | 8.7 (8.0-9.5)                    |                      |
| Alcohol (g)                          |                             |                                                     |                      |                                  |                      |
| IER                                  | 0.3 (0.0-15.9) <sup>d</sup> | 0.3 (0.0-5.1) <sup>d</sup>                          | 0.10 <sup>c</sup>    | 0.0 (0.0-8.7) <sup>d</sup>       | 0.94 <sup>c</sup>    |
| CER                                  | 0.7 (0.0-15.9)              | 0.3 (0.0-4.2)                                       |                      | 1.1 (0.0-8.6)                    |                      |
| Fibre (g)                            |                             |                                                     |                      |                                  |                      |
| IER                                  | 17.8 (16.2-19.5)            | 15.7 (14.4-17.0)                                    | 0.75                 | 15.9 (14.2-17.5)                 | 0.26                 |
| CER                                  | 16.3 (15.1-17.5)            | 16.2 (14.9-17.2)                                    |                      | 16.2 (15.0-17.4)                 |                      |
| Physical activity (MET minutes/week) |                             |                                                     |                      |                                  |                      |

|     |                              |                               |                   |                              |                   |
|-----|------------------------------|-------------------------------|-------------------|------------------------------|-------------------|
| IER | 2040 (972-3267) <sup>d</sup> | 2123 (1305-3582) <sup>d</sup> | 0.85 <sup>c</sup> | 2131 (885-4070) <sup>d</sup> | 0.34 <sup>c</sup> |
| CER | 2577 (1316-4717)             | 2116 (1252-3896)              |                   | 2468 (1605-4317)             |                   |

Mean (95% CI)

Dietary data: baseline and post chemotherapy IER n=54 CER n=66, baseline and mid chemotherapy IER n=48 CER n=61.

Physical activity baseline and post chemotherapy IER n=63 CER n=65), baseline and mid chemotherapy IER n=42 CER n=45.

a ANCOVA between IER and CER at mid chemotherapy cycle adjusted for baseline values

b ANCOVA between IER and CER at 3 weeks post chemotherapy adjusted for baseline values

c Mann Whitney of change in physical activity between baseline and mid chemotherapy cycle and baseline and post chemotherapy

d Median (25<sup>th</sup> and 75% centile)
